# Supplementary material for: Tissue-Specific Regulation of Na+ and K+ Transporters Explains Genotypic Differences in Salinity Stress Tolerance in Rice
Source: PubMed Central journal article supplement (PMC6838216; doi:10.3389/fpls.2019.01361), 2019-11-01
Supplement: Table_1.pdf [file Table_1.pdf]

**Table S1** List of primers used for quantitative real-time PCR (qRT-PCR)

| <b>Gene</b>                     | <b>Gene ID</b> | <b>Forward Primer</b>    | <b>Reverse Primer</b>  |
|---------------------------------|----------------|--------------------------|------------------------|
| <i>OsSOS1</i>                   | Os12g0641100   | ATCAGGTGGAGGCTAGAGCA     | TGACGCACTCCTTTGCAGAT   |
| <i>OsSOS2</i>                   | Os06g0606000   | AACAGAATGAGCCCGTTTGC     | TCCAGTGTGTCACCAGCAAC   |
| <i>OsGORK</i>                   | Os06g0250600   | TTGTCGTCTTTTGC GGCTTG    | GCTGCCGTATTCGCTACTCT   |
| <i>OsAKT1</i>                   | Os01g0648000   | ACAGCCGACAATGTGGTGAA     | CGCCATGCGATCTTCTTTGG   |
| <i>OSA1</i>                     | Os03g0689300   | ACGATGCTCCAGCCCTAAA      | ATGGCGGGAAATCAAATC     |
| <i>OSA2</i>                     | Os07g0191200   | ACTGCTCAGAGGACCATCCA     | TGCGATTTTCGGCTCTCCTAC  |
| <i>OSA3</i>                     | Os12g0638700   | CTGTCACCAAAGGTCCTGGT     | TGCAGAAATTCCCAATAGCC   |
| <i>OSA7</i>                     | Os04g0656100   | TTCCATCACCATCCGTATAGTG   | AGAAGGCTTAACTCTGTCCTTC |
| <i>OSA8</i>                     | Os03g0100800   | TTGGGCAGCCTACAAGACA      | AAGGACCAACCTCTGGAACG   |
| <i><math>\beta</math>-Actin</i> | Os03g0718150   | GGAAGTACAGTGTCTGGATTGGAG | TCTTGGCTTAGCATTCTTGGGT |
